# Supplementary material for: Circulatory zinc transport is controlled by distinct interdomain sites on mammalian albumins
Source: PubMed Central journal article supplement (PMC5450522; doi:10.1039/c6sc02267g), 2016-08-15
Supplement: SC-007-C6SC02267G-s001.pdf [file SC-007-C6SC02267G-s001.pdf]

### Supplementary information

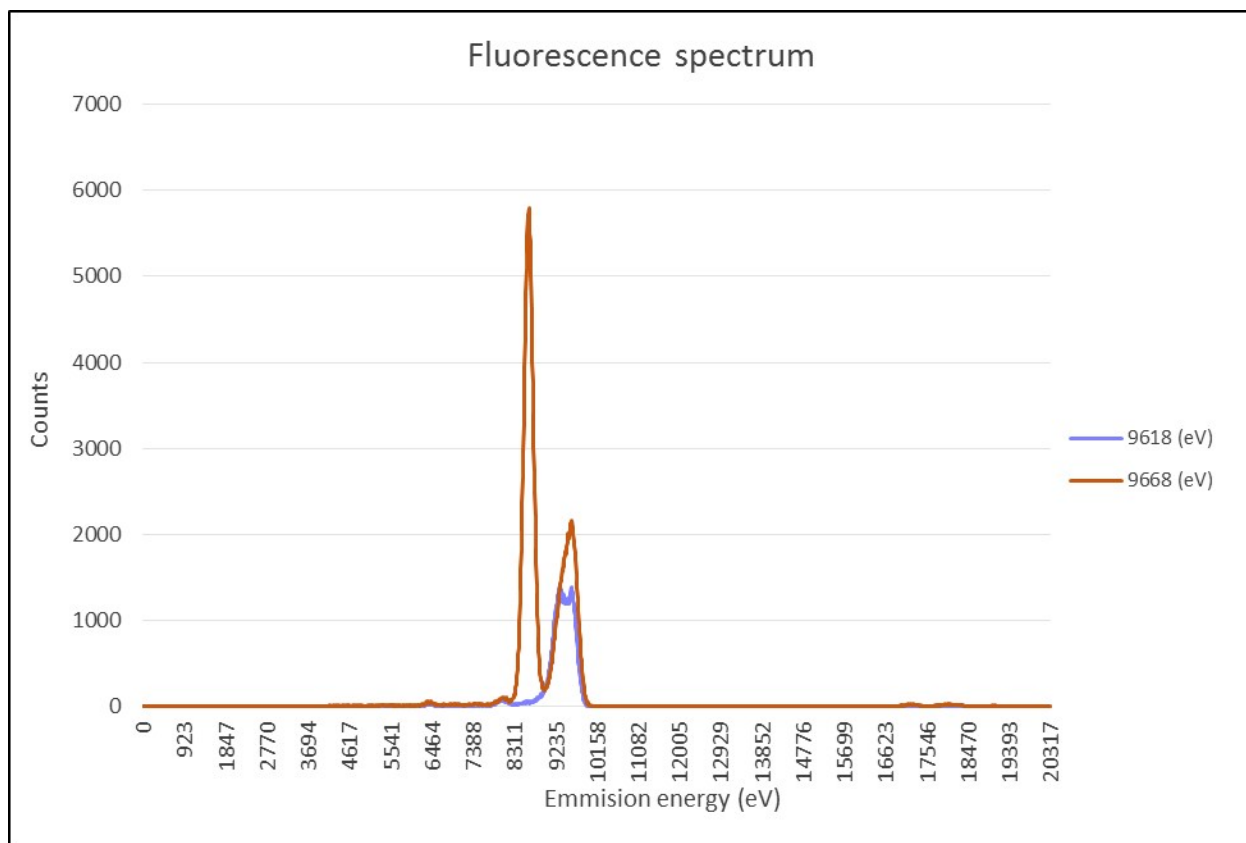

Figure S1. Excited fluorescence spectrum of zinc scattering at energies below (9618 eV – blue) and above (9668 eV –brown) zinc absorption K-edge.

10 20 30 40 50 60 70 80 90 100 110

HsSA DAHKSEVAFRFKLGEEENFKALVLI AFAQYLQCCPFDEHVKLVNEVTEFAKTCVADESAENCCKSLTLFGDKLCTVATLRETYGEMADCCAKQEPERNECFLQHKDDNP 110  
 BtSA DTHKSEIARFNLGEEHFKGLVLI AFSQYLQCCPFDEHVKLVNELTEFAKTCVADESHAGCEKSLTLFGDELCKVASLRETYGDMADCCCKQEPERNECFLSHKDDSP 110  
 FcSA EAHQSEIARFNLGEEHFGRGLVLI AFSQYLQCCPFDEHVKLVNEVTEFAKGCVAQDQSAANCEKSLTLFGDKLCTVASLRDXYGEMADCCCKQEPERNECFLQHKDDNP 110  
 CfSA EAYKSEIARFNLGEEHFGRGLVLI AFSQYLQCCPFDEHVKLVNEVTEFAKCAAEESGANCCKSLTLFGDKLCTVASLRDXYGEMADCCCKQEPDRNECFLQHKDDNP 110  
 EaSA DTHKSEIARFNLGEEHFKGLVLI AFSQYLQCCPFDEHVKLVNEVTEFAKCAAEDESAENCCKSLTLFGDKLCTVATLRATYGELADCCCKQEPERNECFLTHKDDHP 110  
 EcSA DTHKSEIARFNLGEEHFKGLVLI AFSQYLQCCPFDEHVKLVNEVTEFAKCAAEDESAENCCKSLTLFGDKLCTVATLRATYGELADCCCKQEPERNECFLTHKDDHP 110  
 SsSA DTYKSEIARFNLGEEHFKGLVLI AFSQYLQCCPFDEHVKLVNEVTEFAKTCVADESAENCCKSLTLFGDKLCAI PSLREHYGDLADCCCKQEPERNECFLQHKDDNP 110  
 ChSA DTHKSEIARFNLGEEHFQGLVLI AFSQYLQCCPFDEHVKLVNELTEFAKTCVADESHAGCCKSLTLFGDELCKVATLRETYGDMADCCCKQEPERNECFLKHKDDSP 110  
 OaSA DTHKSEIARFNLGEEHFQGLVLI AFSQYLQCCPFDEHVKLVNELTEFAKTCVADESHAGCCKSLTLFGDELCKVATLRETYGDMADCCCKQEPERNECFLKHKDDSP 110  
 OcSA EAHKSEIARFNLGEEHFQGLVLI AFSQYLQCCPFDEHVKLVNELTEFAKTCVADESAENCCKSLTLFGDKLCAI PSLRDTYGVADCCCKQEPERNECFLHHKDDKP 110  
 CpSA EAHKSEIARFNLGEEHFQGLVLI AFSQYLQCCPFDEHVKLVNEVTEFAKCAAEDESAENCCKSLTLFGDKLCAI PSLRETYGELADCCCKQEPDRVECFLQHKDDNP 110  
 MaSA DAHKSEIARFNLGEEHFQGLVLI AFSQYLQCCPFDEHVKLVNEVTEFAKTCVADESAENCCKSLTLFGDKLCAI PTLRDSYGELADCCCKQEPERNECFLKHKDDSP 110  
 MmSA EAHKSEIARFNLGEEHFQGLVLI AFSQYLQCCPFDEHVKLVNEVTEFAKTCVADESAENCCKSLTLFGDKLCAI PNLRENYGELADCCCKQEPERNECFLQHKDDNP 110  
 RnSA EAHKSEIARFNLGEEHFQGLVLI AFSQYLQCCPFDEHVKLVNEVTEFAKTCVADESAENCCKSLTLFGDKLCAI PKLRDNYGELADCCCKQEPERNECFLQHKDDNP 110

120 130 140 150 160 170 180 190 200 210 220

HsSA NLPRLVKPEPVDVMTAFHDNEETFLKLYLIE IARRHPYFYAPELFFFAKRYKAAFTCECCQAADKAAACLLPKLDELREDEGKASSAQRLKCSAQKQFGERAFKAWAVARLS 220  
 BtSA DLPKL-KPEPNTLCDEFKAEKDFWKGKLYE IARRHPYFYAPELFFFAKRYKAAFTCECCQAADKAAACLLPKLDELREDEGKASSAQRLKCSAQKQFGERAFKAWAVARLS 219  
 FcSA GFQQLVTPPEADAMCTAFHENEQRFLGKLYE IARRHPYFYAPELFFFAKRYKAAFTCECCQAADKAAACLLPKLDELREDEGKASSAQRLKCSAQKQFGERAFKAWAVARLS 220  
 CfSA GFFPLVAPEPDALCAAFQDNEQLFLGKLYE IARRHPYFYAPELFFFAKRYKAAFTCECCQAADKAAACLLPKLDELREDEGKASSAQRLKCSAQKQFGERAFKAWAVARLS 220  
 EaSA NLPKL-KPEPDAQCAAFQDNDPKFLGKLYE IARRHPYFYAPELFFFAKRYKAAFTCECCQAADKAAACLLPKLDELREDEGKASSAQRLKCSAQKQFGERAFKAWAVARLS 219  
 EcSA NLPKL-KPEPDAQCAAFQDNDPKFLGKLYE IARRHPYFYAPELFFFAKRYKAAFTCECCQAADKAAACLLPKLDELREDEGKASSAQRLKCSAQKQFGERAFKAWAVARLS 219  
 SsSA DIPKL-KPDPVALCADFQDEDEKFWGKLYE IARRHPYFYAPELFFFAKRYKAAFTCECCQAADKAAACLLPKLDELREDEGKASSAQRLKCSAQKQFGERAFKAWAVARLS 219  
 ChSA DLPKL-KPEPDTLCAEFKAEKDFWKGKLYE IARRHPYFYAPELFFFAKRYKAAFTCECCQAADKAAACLLPKLDELREDEGKASSAQRLKCSAQKQFGERAFKAWAVARLS 219  
 OaSA DLPKL-KPEPDTLCAEFKAEKDFWKGKLYE IARRHPYFYAPELFFFAKRYKAAFTCECCQAADKAAACLLPKLDELREDEGKASSAQRLKCSAQKQFGERAFKAWAVARLS 219  
 OcSA DLPPFARPEADVLCKAFHDEKAFHGHYLYE IARRHPYFYAPELFFFAKRYKAAFTCECCQAADKAAACLLPKLDELREDEGKASSAQRLKCSAQKQFGERAFKAWAVARLS 220  
 CpSA NLPPFERPEPEALCTAFKENNDRF IGHYLYE IARRHPYFYAPELFFFAKRYKAAFTCECCQAADKAAACLLPKLDELREDEGKASSAQRLKCSAQKQFGERAFKAWAVARLS 220  
 MaSA NLPPFVRPDAEAMCTSFQENAVTFMGHYLYE IARRHPYFYAPELFFFAKRYKAAFTCECCQAADKAAACLLPKLDELREDEGKASSAQRLKCSAQKQFGERAFKAWAVARLS 220  
 MmSA SLPPFERPEAEAMCTSFQENAVTFMGHYLYE IARRHPYFYAPELFFFAKRYKAAFTCECCQAADKAAACLLPKLDELREDEGKASSAQRLKCSAQKQFGERAFKAWAVARLS 220  
 RnSA NLPPFVRPDAEAMCTSFQENAVTFMGHYLYE IARRHPYFYAPELFFFAKRYKAAFTCECCQAADKAAACLLPKLDELREDEGKASSAQRLKCSAQKQFGERAFKAWAVARLS 220

230 240 250 260 270 280 290 300 310 320 330

HsSA QRFPKAEFAEVSKIVTDLTKVHKECCGGLLECAADRADLAKYICENQDSTSSKLECCCKPVLKESH CIAEVENDEMPADLP SLAADFVESKDVCNKYAEAKDVLGTF 330  
 BtSA QRFPKAEFAEVSKIVTDLTKVHKECCGGLLECAADRADLAKYICENQDSTSSKLECCCKPVLKESH CIAEVEKDAIPENLPLTADFAEDKVCNKYQEAQDFLGSF 329  
 FcSA QRFPKAEFAEISKIVTDLTKVHKECCGGLLECAADRADLAKYICENQDSTSSKLECCCKPVLKESH CISEVERDELADLPPLAVDFVEDKEVCNKYQEAQDFLGSF 330  
 CfSA QRFPKAEFAEISKIVTDLTKVHKECCGGLLECAADRADLAKYICENQDSTSSKLECCCKPVLKESH CIAEVEKDAIPENLPLTADFAEDKVCNKYQEAQDFLGSF 330  
 EaSA QRFPKAEFAEISKIVTDLTKVHKECCGGLLECAADRADLAKYICENQDSTSSKLECCCKPVLKESH CIAEVEKDDLPDLPALAADFAEDKEICKHYKDAKDFLGSF 329  
 EcSA QRFPKAEFAEISKIVTDLTKVHKECCGGLLECAADRADLAKYICENQDSTSSKLECCCKPVLKESH CIAEVEKDDLPDLPALAADFAEDKEICKHYKDAKDFLGSF 329  
 SsSA QRFPKAEFAEISKIVTDLTKVHKECCGGLLECAADRADLAKYICENQDSTSSKLECCCKPVLKESH CIAEVEKDDLPDLPALAADFAEDKEICKHYKDAKDFLGSF 329  
 ChSA QRFPKAEFAEISKIVTDLTKVHKECCGGLLECAADRADLAKYICENQDSTSSKLECCCKPVLKESH CIAEVEKDDLPDLPALAADFAEDKEICKHYKDAKDFLGSF 329  
 OaSA QRFPKAEFAEISKIVTDLTKVHKECCGGLLECAADRADLAKYICENQDSTSSKLECCCKPVLKESH CIAEVEKDDLPDLPALAADFAEDKEICKHYKDAKDFLGSF 329  
 OcSA QRFPKAEFAEISKIVTDLTKVHKECCGGLLECAADRADLAKYICENQDSTSSKLECCCKPVLKESH CIAEVEKDDLPDLPALAADFAEDKEICKHYKDAKDFLGSF 330  
 CpSA QRFPKAEFAEISKIVTDLTKVHKECCGGLLECAADRADLAKYICENQDSTSSKLECCCKPVLKESH CIAEVEKDDLPDLPALAADFAEDKEICKHYKDAKDFLGSF 330  
 MaSA QRFPKAEFAEISKIVTDLTKVHKECCGGLLECAADRADLAKYICENQDSTSSKLECCCKPVLKESH CIAEVEKDDLPDLPALAADFAEDKEICKHYKDAKDFLGSF 330  
 MmSA QRFPKAEFAEISKIVTDLTKVHKECCGGLLECAADRADLAKYICENQDSTSSKLECCCKPVLKESH CIAEVEKDDLPDLPALAADFAEDKEICKHYKDAKDFLGSF 330  
 RnSA QRFPKAEFAEISKIVTDLTKVHKECCGGLLECAADRADLAKYICENQDSTSSKLECCCKPVLKESH CIAEVEKDDLPDLPALAADFAEDKEICKHYKDAKDFLGSF 330

340 350 360 370 380 390 400 410 420 430 440

HsSA LYEYARRHPDYSVLLLRILAKTYEATLEKCCAADPHACYAKVDFEFKPLVEEPQNLKQNCLEFELQGEYGFQNALIVRYTRKVPQVSTPTLVEVSRNLGKVGSRCCCKH 440  
 BtSA LYEYARRHPDYSVLLLRILAKTYEATLEKCCAADPHACYAKVDFEFKPLVEEPQNLKQNCLEFELQGEYGFQNALIVRYTRKVPQVSTPTLVEVSRNLGKVGSRCCCKH 439  
 FcSA LYEYARRHPDYSVLLLRILAKTYEATLEKCCAADPHACYAKVDFEFKPLVEEPQNLKQNCLEFELQGEYGFQNALIVRYTRKVPQVSTPTLVEVSRNLGKVGSRCCCKH 440  
 CfSA LYEYARRHPDYSVLLLRILAKTYEATLEKCCAADPHACYAKVDFEFKPLVEEPQNLKQNCLEFELQGEYGFQNALIVRYTRKVPQVSTPTLVEVSRNLGKVGSRCCCKH 440  
 EaSA LYEYARRHPDYSVLLLRILAKTYEATLEKCCAADPHACYAKVDFEFKPLVEEPQNLKQNCLEFELQGEYGFQNALIVRYTRKVPQVSTPTLVEVSRNLGKVGSRCCCKH 439  
 EcSA LYEYARRHPDYSVLLLRILAKTYEATLEKCCAADPHACYAKVDFEFKPLVEEPQNLKQNCLEFELQGEYGFQNALIVRYTRKVPQVSTPTLVEVSRNLGKVGSRCCCKH 439  
 SsSA LYEYARRHPDYSVLLLRILAKTYEATLEKCCAADPHACYAKVDFEFKPLVEEPQNLKQNCLEFELQGEYGFQNALIVRYTRKVPQVSTPTLVEVSRNLGKVGSRCCCKH 439  
 ChSA LYEYARRHPDYSVLLLRILAKTYEATLEKCCAADPHACYAKVDFEFKPLVEEPQNLKQNCLEFELQGEYGFQNALIVRYTRKVPQVSTPTLVEVSRNLGKVGSRCCCKH 439  
 OaSA LYEYARRHPDYSVLLLRILAKTYEATLEKCCAADPHACYAKVDFEFKPLVEEPQNLKQNCLEFELQGEYGFQNALIVRYTRKVPQVSTPTLVEVSRNLGKVGSRCCCKH 439  
 OcSA LYEYARRHPDYSVLLLRILAKTYEATLEKCCAADPHACYAKVDFEFKPLVEEPQNLKQNCLEFELQGEYGFQNALIVRYTRKVPQVSTPTLVEVSRNLGKVGSRCCCKH 440  
 CpSA LYEYARRHPDYSVLLLRILAKTYEATLEKCCAADPHACYAKVDFEFKPLVEEPQNLKQNCLEFELQGEYGFQNALIVRYTRKVPQVSTPTLVEVSRNLGKVGSRCCCKH 440  
 MaSA LYEYARRHPDYSVLLLRILAKTYEATLEKCCAADPHACYAKVDFEFKPLVEEPQNLKQNCLEFELQGEYGFQNALIVRYTRKVPQVSTPTLVEVSRNLGKVGSRCCCKH 440  
 MmSA LYEYARRHPDYSVLLLRILAKTYEATLEKCCAADPHACYAKVDFEFKPLVEEPQNLKQNCLEFELQGEYGFQNALIVRYTRKVPQVSTPTLVEVSRNLGKVGSRCCCKH 440  
 RnSA LYEYARRHPDYSVLLLRILAKTYEATLEKCCAADPHACYAKVDFEFKPLVEEPQNLKQNCLEFELQGEYGFQNALIVRYTRKVPQVSTPTLVEVSRNLGKVGSRCCCKH 440



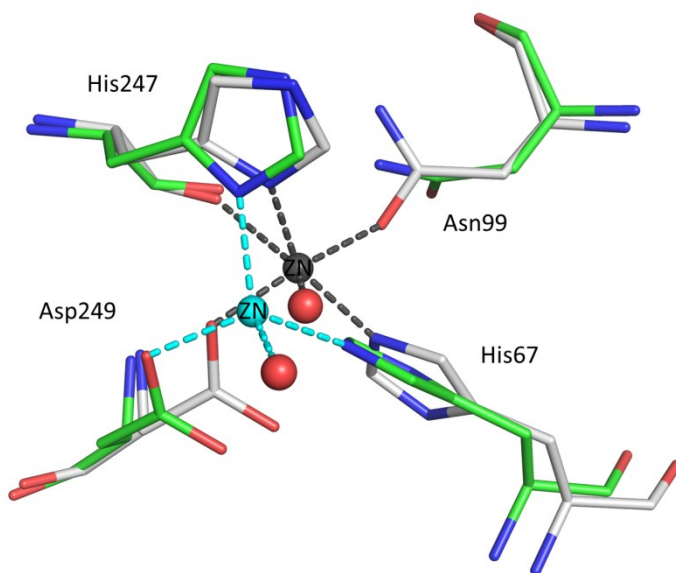

Figure S3. Superposition of EXAFS model (carbon atoms white) of HSA<sup>2</sup> in complex with zinc and crystal structure of ESA (this work) in complex with zinc (carbon atoms green, PDB ID: 5IIH). Nitrogen is marked in blue, oxygen in red. Zinc is presented in dark gray in the EXAFS structure and in cyan in crystal structure. Bonds between metal and coordinating atoms are represented by dashed lines.

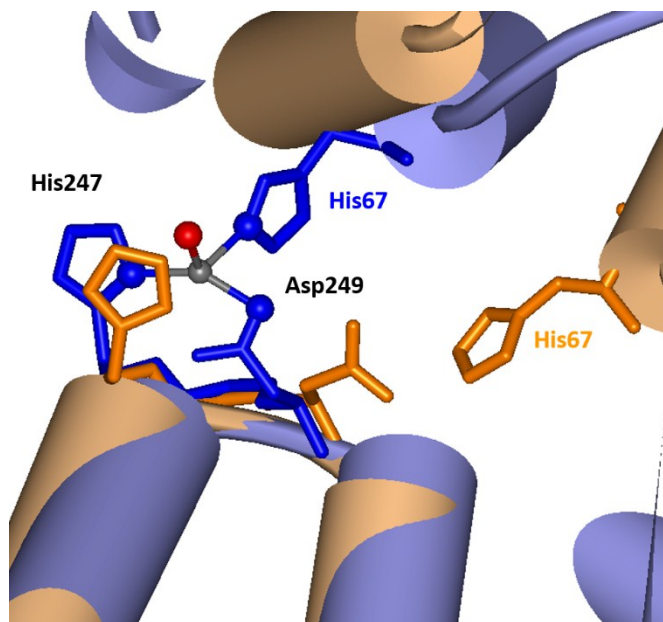

Figure S4. Fatty-acid binding induced disruption of the major zinc binding site on human serum albumin. Residues and backbone schematics in blue refer to pdb 5IJF (this work), residues and backbone in orange refer to pdb 1BJ5.<sup>3</sup> The zinc ion is shown in grey, and the coordinated water oxygen in red. A domain-domain movement induced by binding of myristate in fatty acid binding site FA2 increases the distance between the zinc-coordinating nitrogen atoms from 3.5 Å to 8.6 Å. The overlay was generated in Swiss pdb viewer v. 4.1 by matching the backbone atoms for residues 245-251. The Figure was generated in WebLabViewerpro 4.0.

## References

- 1 K. Katoh and D. M. Standley, *Mol. Biol. Evol.*, 2013, **30**, 772–80.
- 2 C. A. Blindauer, I. Harvey, K. E. Bunyan, A. J. Stewart, D. Sleep, D. J. Harrison, S. Berezenko and P. J. Sadler, *J. Biol. Chem.*, 2009, **284**, 23116–24.
- 3 S. Curry, H. Mandelkow, P. Brick and N. Franks, *Nat. Struct. Biol.*, 1998, **5**, 827–835.
